# Supplementary material for: Correlating Basal Gene Expression across Chemical Sensitivity Data to Screen for Novel Synergistic Interactors of HDAC Inhibitors in Pancreatic Carcinoma
Source: MDPI journal article supplement (doi:10.3390/ph16020294), 2023-02-14
Supplement: s1 [file s1]

## SUPPORTING INFORMATION

### Correlating basal gene expression across chemical sensitivity data to screen for novel synergistic interactors of HDAC inhibitors in pancreatic carcinoma

Nemanja Djokovic <sup>1, \*</sup>, Ana Djuric <sup>2</sup>, Dusan Ruzic <sup>1</sup>, Tatjana Srdic-Rajic <sup>2</sup> and Katarina Nikolic <sup>1,\*</sup>

<sup>1</sup> Department of Pharmaceutical Chemistry, Faculty of Pharmacy, University of Belgrade, Vojvode Stepe 450, 11221 Belgrade, Serbia

<sup>2</sup> Department of Experimental Oncology, Institute for Oncology and Radiology of Serbia, Pasterova 14, 11000 Belgrade, Serbia

\* Correspondence: nemanja.djokovic@pharmacy.bg.ac.rs (N.D.); katarina.nikolic@pharmacy.bg.ac.rs (K.N.)

**Supplementary Note S1.** Detailed results of experimental evaluation of synergisms with concentration annotations.

**Legend:**

| Symbol | Description            |
|--------|------------------------|
| +++++  | Very strong synergism  |
| +++    | Synergism              |
| ++     | Moderate synergism     |
| +      | Slight synergism       |
| ±      | Nearly additive        |
| –      | Slight antagonism      |
| --     | Moderate antagonism    |
| ---    | Antagonism             |
| ----   | Strong antagonism      |
| -----  | Very strong antagonism |

**MIA PaCa-2 cell line**

| Drug                             | Drug concentration |            |            |            |
|----------------------------------|--------------------|------------|------------|------------|
|                                  | I                  | II         | III        | IV         |
| HDACi ( <b>6b</b> )              | 48.60±7.45         | 13.58±2.33 | 4.80±1.01  | 2.91±0.87  |
| ROCKi (RKI-1447)                 | 64.18±8.12         | 40.49±5.55 | 37.49±3.02 | 30.84±7.33 |
| <b>6b</b> + RKI-1447             | 83.28±10.34        | 55.48±7.51 | 37.69±5.38 | 38.31±4.56 |
| Combination Index (CI)           | 0.445              | 0.981      | 1.253      | 0.605      |
| Interaction <b>6b</b> + RKI-1447 | +++                | +          | --         | ++         |

Compound 6 (μM): I=50; II=25; III=12.5; IV=6.25  
 RKI (μM): I=30; II=15; III=7.5; IV=3.75

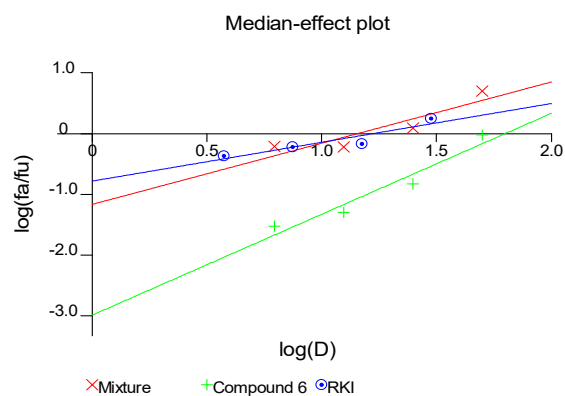

**Figure S1.** The median-effect plot for tested synergism between 6b and RKI-1447 on MIA PaCa-2 cell line. In this plot,  $f_a$  is the fraction of cells affected, while the  $f_u$  is the fraction of cells unaffected, D is the dose of a drug.

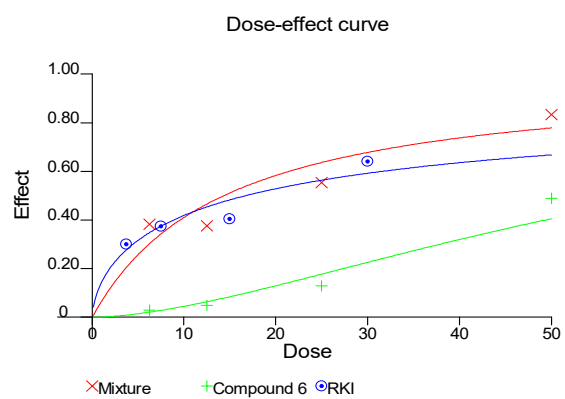

**Figure S2.** Dose-effect curve for tested synergism between 6b and RKI-1447 on MIA PaCa-2 cell line.

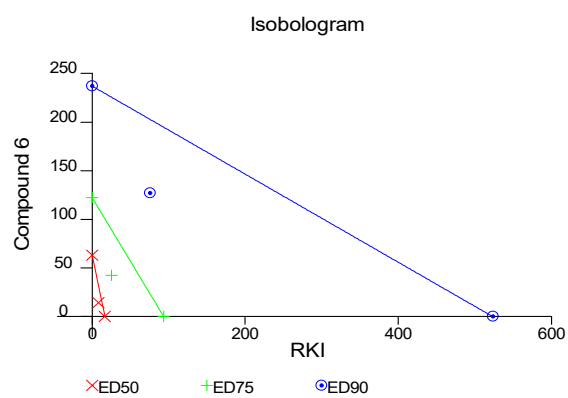

**Figure S3.** Isobologram for synergism between 6b and RKI-1447 on MIA PaCa-2 cell line.

# MIA PaCa-2 cell line

| Drug                             | Drug concentration |            |            |            |
|----------------------------------|--------------------|------------|------------|------------|
|                                  | I                  | II         | III        | IV         |
| HDACi ( <b>8b</b> )              | 27.30±4.44         | 1.83±0.70  | 0.94±0.45  | 0.57±0.19  |
| ROCKi (RKI-1447)                 | 62.94±10.11        | 42.93±6.99 | 36.07±7.51 | 35.46±4.09 |
| <b>8b</b> + RKI-1447             | 73.02±7.44         | 45.32±5.14 | 31.14±5.21 | 28.91±2.34 |
| Combination Index (CI)           | 0.333              | 1.564      | 2.469      | 1.505      |
| Interaction <b>8b</b> + RKI-1447 | +++                | ---        | ---        | ---        |

Compound 8 (μM): I=6; II=3; III=1.5; IV=0.75  
 RKI (μM): I=30; II=15; III=7.5; IV=3.75

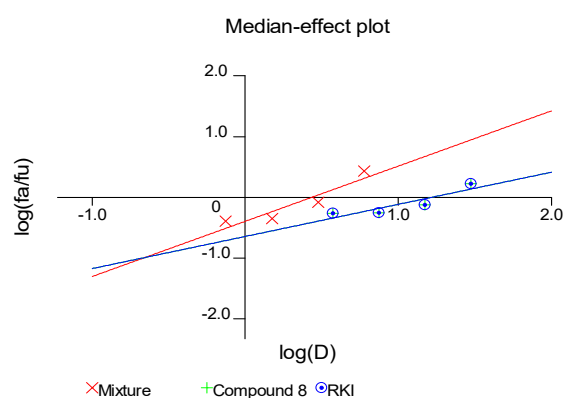

**Figure S4.** The median-effect plot for tested synergism between 8b and RKI-1447 on MIA PaCa-2 cell line. In this plot, *fa* is the fraction of cells affected, while the *fu* is the fraction of cells unaffected, D is the dose of a drug.

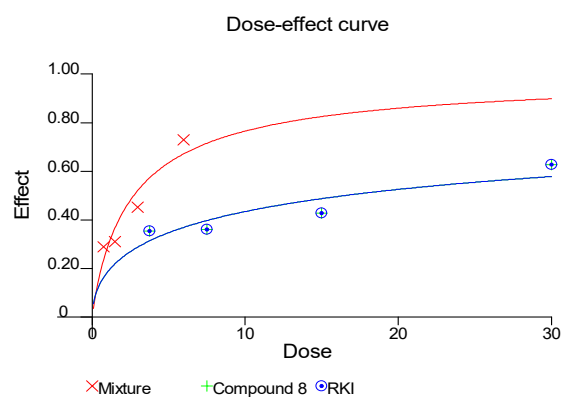

**Figure S5.** Dose-effect curve for tested synergism between 8b and RKI-1447 on MIA PaCa-2 cell line.

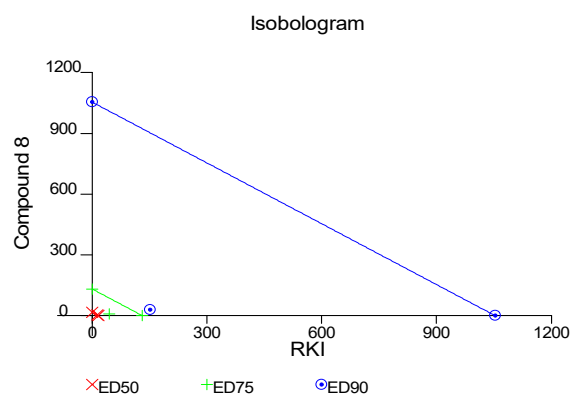

**Figure S6.** Isobologram for synergism between 8b and RKI-1447 on MIA PaCa-2 cell line.

#### MIA PaCa-2 cell line

| Drug                             | Drug concentration |            |            |            |
|----------------------------------|--------------------|------------|------------|------------|
|                                  | I                  | II         | III        | IV         |
| HDACi ( <b>9b</b> )              | 44.65±3.39         | 18.25±2.22 | 1.71±0.67  | 0.46±0.20  |
| ROCKi (RKI-1447)                 | 61.64±7.78         | 43.28±5.38 | 35.02±3.25 | 29.16±2.16 |
| <b>9b</b> + RKI-1447             | 78.03±7.18         | 64.37±6.78 | 41.91±5.98 | 33.32±4.21 |
| Combination Index (CI)           | 0.513              | 0.577      | 0.964      | 0.803      |
| Interaction <b>9b</b> + RKI-1447 | +++                | +++        | ±          | ++         |

Compound 9 (μM): I=50; II=25; III=12.5; IV=6.25

RKI (μM): I=30; II=15; III=7.5; IV=3.75

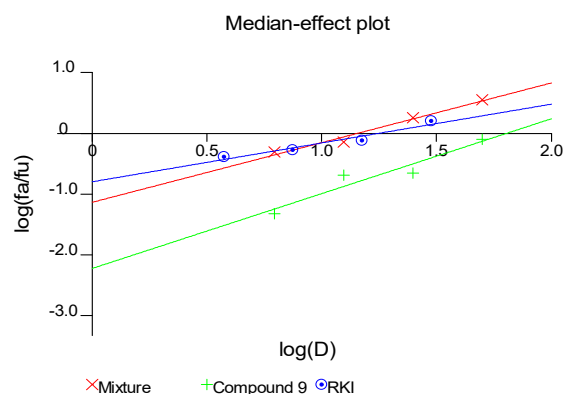

**Figure S7.** The median-effect plot for tested synergism between 9b and RKI-1447 on MIA PaCa-2 cell line. In this plot,  $fa$  is the fraction of cells affected, while the  $fu$  is the fraction of cells unaffected,  $D$  is the dose of a drug.

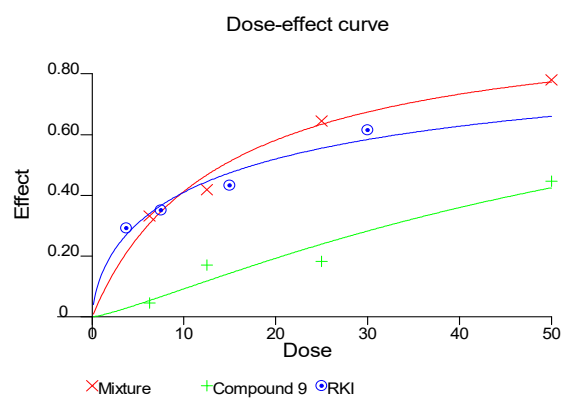

**Figure S8.** Dose-effect curve for tested synergism between 9b and RKI-1447 on MIA PaCa-2 cell line.

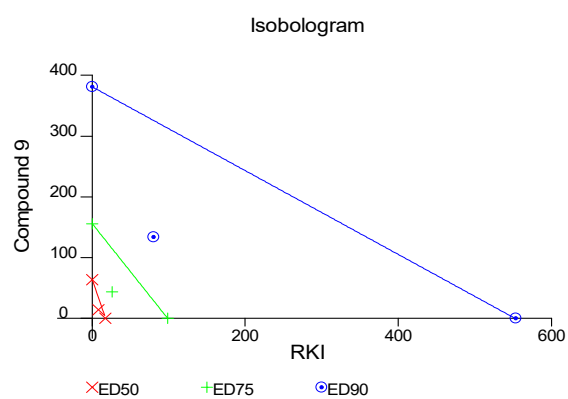

**Figure S9.** Isobologram for synergism between 9b and RKI-1447 on MIA PaCa-2 cell line.

# Panc-1 cell line

| Drug                             | Drug concentration |            |            |            |
|----------------------------------|--------------------|------------|------------|------------|
|                                  | I                  | II         | III        | IV         |
| HDACi ( <b>6b</b> )              | 23.61±3.26         | 1.39±0.55  | 0.47±0.21  | 0.5±0.2    |
| ROCKi (RKI-1447)                 | 62.76±11.23        | 33.89±8.92 | 22.02±7.22 | 18.11±5.90 |
| <b>6b</b> + RKI-1447             | 69.79±10.45        | 48.51±6.34 | 24.98±3.13 | 8.92±4.21  |
| Combination Index (CI)           | 0.992              | 1.050      | 1.334      | 2.117      |
| Interaction <b>6b</b> + RKI-1447 | ±                  | ±          | --         | ---        |

Compound 6 (μM): I=50; II=25; III=12.5; IV=6.25  
RKI (μM): I=50; II=25; III=12.5; IV=6.25

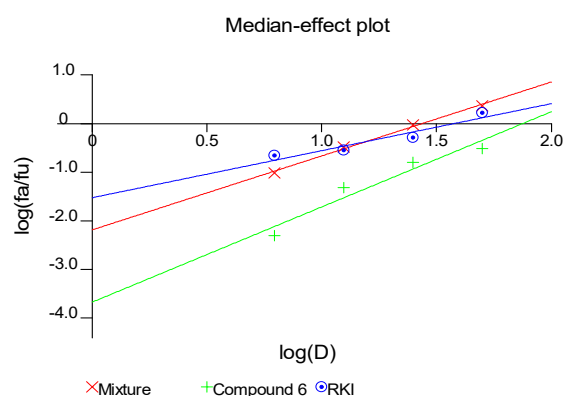

**Figure S10.** The median-effect plot for tested synergism between 6b and RKI-1447 on Panc-1 cell line. In this plot, *fa* is the fraction of cells affected, while the *fu* is the fraction of cells unaffected, *D* is the dose of a drug.

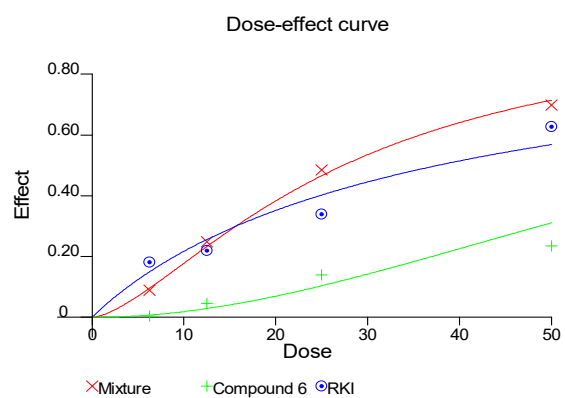

**Figure S11.** Dose-effect curve for tested synergism between 6b and RKI-1447 on Panc-1 cell line.

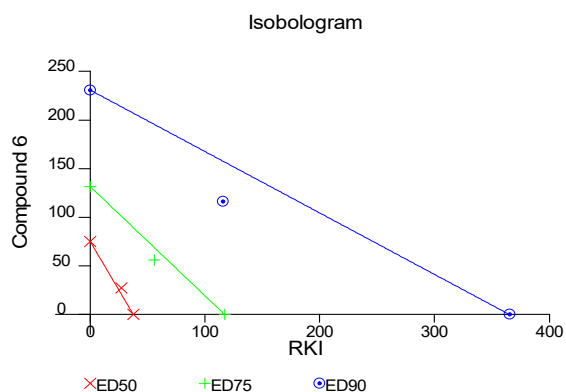

**Figure S12.** Isobologram for synergism between 6b and RKI-1447 on Panc-1 cell line.

#### Panc-1 cell line

| Drug                             | Drug concentration |            |            |           |
|----------------------------------|--------------------|------------|------------|-----------|
|                                  | I                  | II         | III        | IV        |
| HDACi ( <b>8b</b> )              | 49.78±6.77         | 38.21±5.89 | 17.13±2.11 | 0.1±0.05  |
| ROCKi (RKI-1447)                 | 58.78±5.55         | 30.77±3.45 | 17.27±2.28 | 7.41±2.56 |
| <b>8b</b> + RKI-1447             | 63.94±6.33         | 42.96±5.79 | 21.99±3.45 | 6.79±3.06 |
| Combination Index (CI)           | 3.133              | 1.433      | 1.266      | 1.474     |
| Interaction <b>8b</b> + RKI-1447 | — — —              | — —        | — —        | — — —     |

Compound 8 (μM): I=20; II=10; III=5.0; IV=2.5

RKI (μM): I=50; II=25; III=12.5; IV=6.25



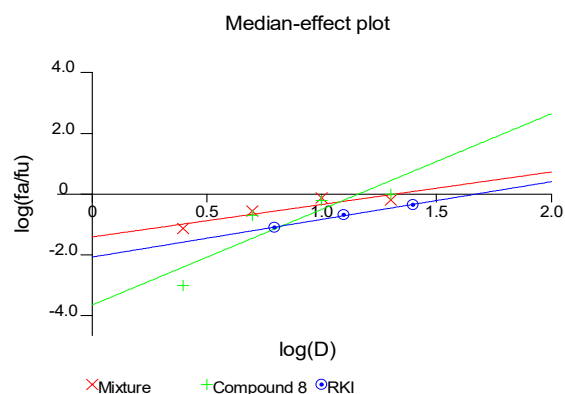

**Figure S13.** The median-effect plot for tested synergism between 8b and RKI-1447 on Panc-1 cell line. In this plot,  $f_a$  is the fraction of cells affected, while the  $f_u$  is the fraction of cells unaffected,  $D$  is the dose of a drug.

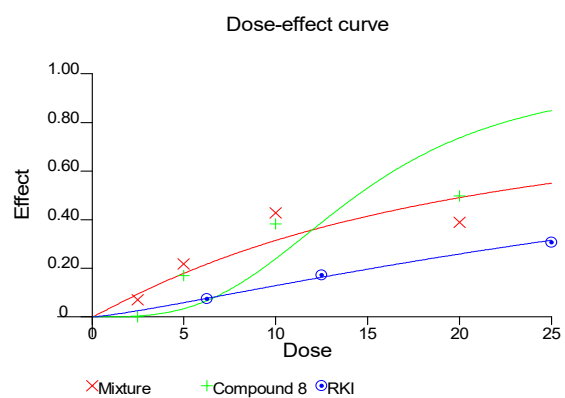

**Figure S14.** Dose-effect curve for tested synergism between 8b and RKI-1447 on Panc-1 cell line.

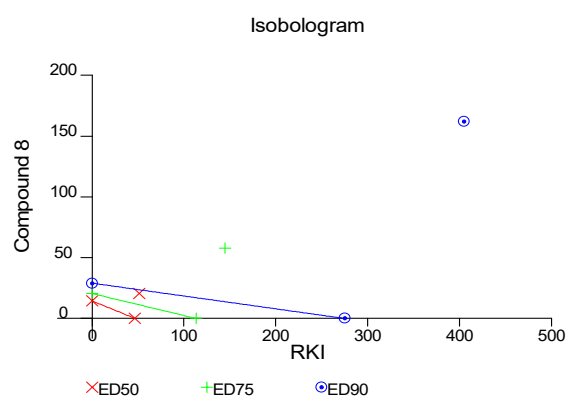

**Figure S15.** Isobologram for synergism between 8b and RKI-1447 on Panc-1 cell line.

# Panc-1 cell line

| Drug                             | Drug concentration |            |            |            |
|----------------------------------|--------------------|------------|------------|------------|
|                                  | I                  | II         | III        | IV         |
| HDACi ( <b>9b</b> )              | 45.18±4.55         | 23.14±7.42 | 7.56±3.71  | 1.12±0.89  |
| ROCKi (RKI-1447)                 | 64.82±6.41         | 37.92±5.34 | 19.76±2.30 | 9.41±1.06  |
| <b>9b</b> + RKI-1447             | 64.68±5.01         | 51.26±7.20 | 33.14±6.10 | 18.01±4.02 |
| Combination Index (CI)           | 1.705              | 1.207      | 0.975      | 0.823      |
| Interaction <b>9b</b> + RKI-1447 | ---                | --         | ±          | +          |

Compound 9 (μM): I=50; II=25; III=12.5; IV=6.25  
RKI (μM): I=50; II=25; III=12.5; IV=6.25

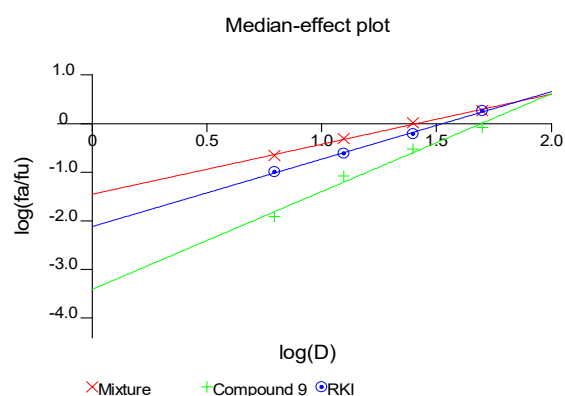

**Figure S16.** The median-effect plot for tested synergism between **9b** and RKI-1447 on Panc-1 cell line. In this plot, *fa* is the fraction of cells affected, while the *fu* is the fraction of cells unaffected, D is the dose of a drug.

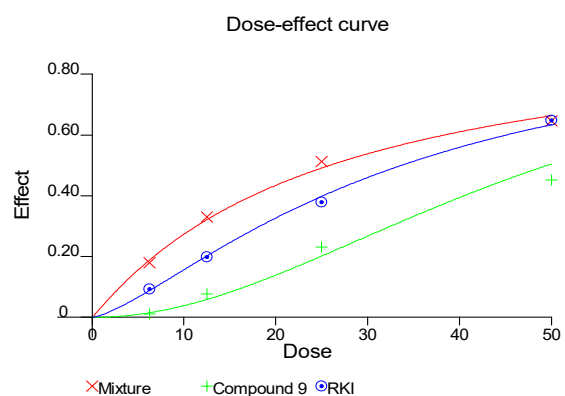

**Figure S17.** Dose-effect curve for tested synergism between 9b and RKI-1447 on Panc-1 cell line.

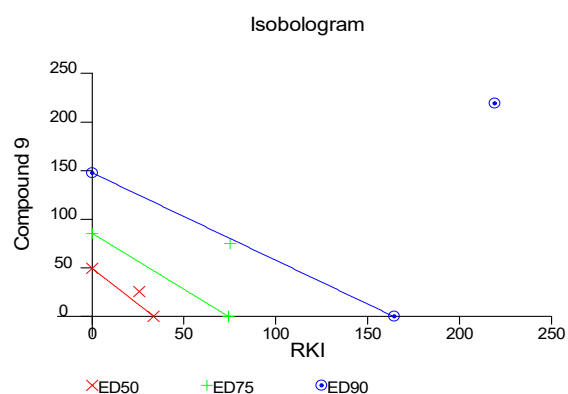

**Figure S18.** Isobologram for synergism between 9b and RKI-1447 on Panc-1 cell line.

### MIA PaCa-2 cell line

| Drug                               | Drug concentration |             |             |            |
|------------------------------------|--------------------|-------------|-------------|------------|
|                                    | I                  | II          | III         | IV         |
| HDACi ( <b>6b</b> )                | 71.49±11.91        | 41.62±11.91 | 23.06±9.75  | 16.27±5.34 |
| Fingolimod                         | 79.98±10.36        | 48.31±12.04 | 20.57±4.85  | 20.33±5.37 |
| <b>6b</b> + Fingolimod             | 89.28±4.05         | 60.81±20.19 | 34.11±14.58 | 26.96±7.59 |
| Combination Index (CI)             | 0.780              | 1.422       | 1.648       | 1.070      |
| Interaction <b>6b</b> + Fingolimod | ++                 | --          | ---         | ±          |

Compound 6 (μM): I=50; II=25; III=12.5; IV=6.25  
Fingolimod (μM): I=8; II=4; III=2; IV=1

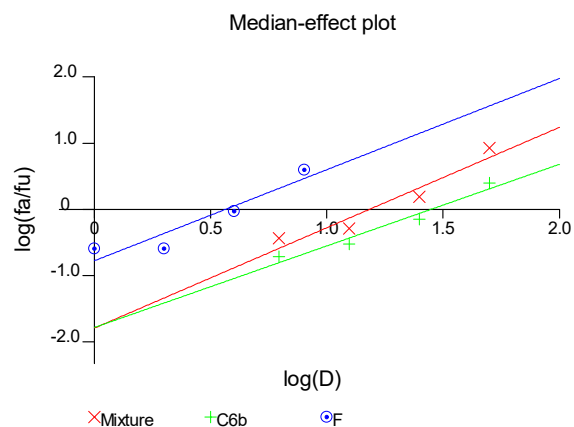

**Figure S19.** The median-effect plot for tested synergism between 6b and fingolimod on MIA PaCa-2 cell line. In this plot,  $fa$  is the fraction of cells affected, while the  $fu$  is the fraction of cells unaffected,  $D$  is the dose of a drug.

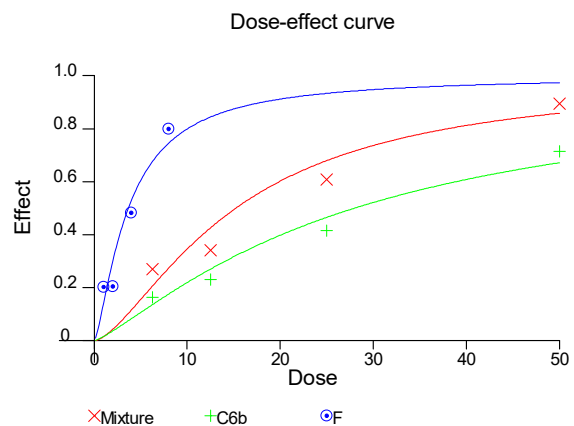

**Figure S20.** Dose-effect curve for tested synergism between 6b and fingolimod on MIA PaCa-2 cell line.

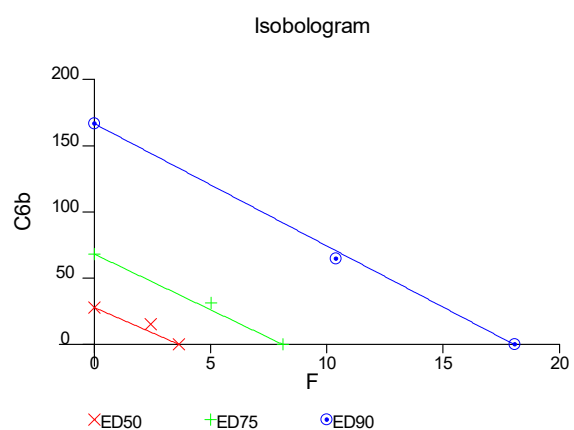

**Figure S21.** Isobologram for synergism between 6b and fingolimod on MIA PaCa-2 cell line.

# MIA PaCa-2 cell line

| Drug                               | Drug concentration |            |            |            |
|------------------------------------|--------------------|------------|------------|------------|
|                                    | I                  | II         | III        | IV         |
| HDACi ( <b>8b</b> )                | 81.22±0.96         | 68.72±2.69 | 36.08±3.29 | 16.72±4.28 |
| Fingolimod                         | 87.22±2.01         | 52.02±2.47 | 23.73±3.92 | 22.83±1.89 |
| <b>8b</b> + Fingolimod             | 91.31±10.08        | 65.06±1.92 | 38.98±5.26 | 26.55±2.94 |
| Combination Index (CI)             | 1.188              | 1.836      | 1.852      | 1.338      |
| Interaction <b>8b</b> + Fingolimod | — — —              | — — —      | — — —      | — —        |

Compound 8 ( $\mu\text{M}$ ): I=10; II=5; III=2.5; IV=1.25

Fingolimod ( $\mu\text{M}$ ): I=8; II=4; III=2; IV=1

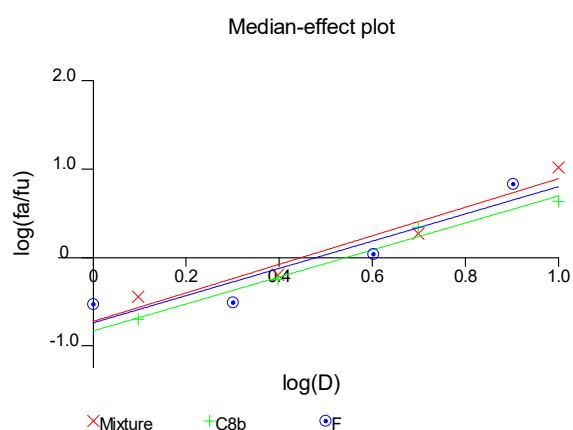

**Figure S22.** The median-effect plot for tested synergism between 8b and fingolimod on MIA PaCa-2 cell line. In this plot,  $f_a$  is the fraction of cells affected, while the  $f_u$  is the fraction of cells unaffected, D is the dose of a drug.

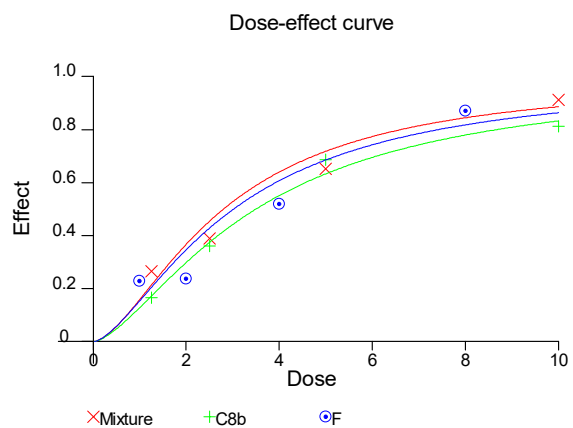

**Figure S23.** Dose-effect curve for tested synergism between 8b and fingolimod on MIA PaCa-2 cell line.

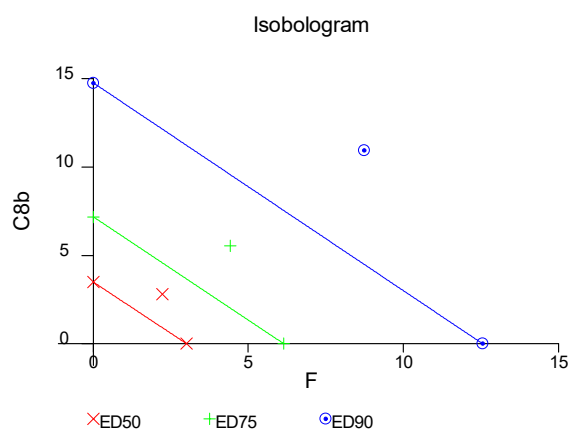

**Figure S24.** Isobologram for synergism between 8b and fingolimod on MIA PaCa-2 cell line.

**MIA PaCa-2 cell line**

| Drug                               | Drug concentration |             |             |             |
|------------------------------------|--------------------|-------------|-------------|-------------|
|                                    | I                  | II          | III         | IV          |
| HDACi ( <b>9b</b> )                | 83.61±0.27         | 69.42±11.34 | 53.31±17.80 | 44.84±11.21 |
| Fingolimod                         | 76.58±4.48         | 63.82±6.81  | 43.78±12.65 | 35.34±6.99  |
| <b>9b</b> + Fingolimod             | 89.11±1.57         | 73.59±12.40 | 55.57±18.16 | 47.22±9.51  |
| Combination Index (CI)             | 0.870              | 1.449       | 1.773       | 1.293       |
| Interaction <b>9b</b> + Fingolimod | +                  | — —         | — — —       | — —         |

Compound 9 (μM): I=50; II=25; III=12.5; IV=6.25  
Fingolimod (μM): I=8; II=4; III=2; IV=1

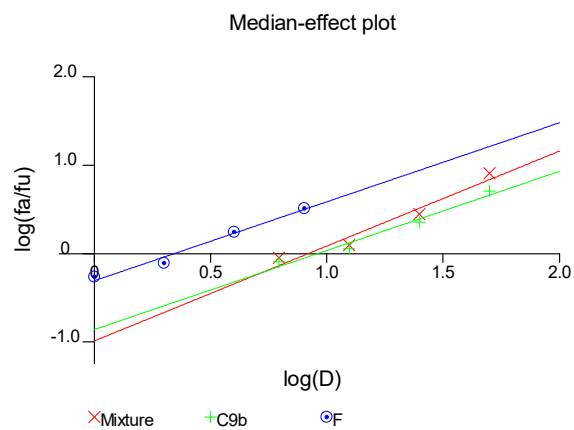

**Figure S25.** The median-effect plot for tested synergism between 9b and fingolimod on MIA PaCa-2 cell line. In this plot,  $fa$  is the fraction of cells affected, while the  $fu$  is the fraction of cells unaffected,  $D$  is the dose of a drug.

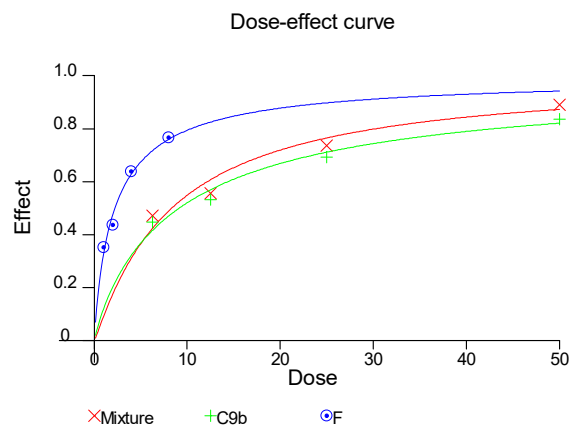

**Figure S26.** Dose-effect curve for tested synergism between 9b and fingolimod on MIA PaCa-2 cell line.

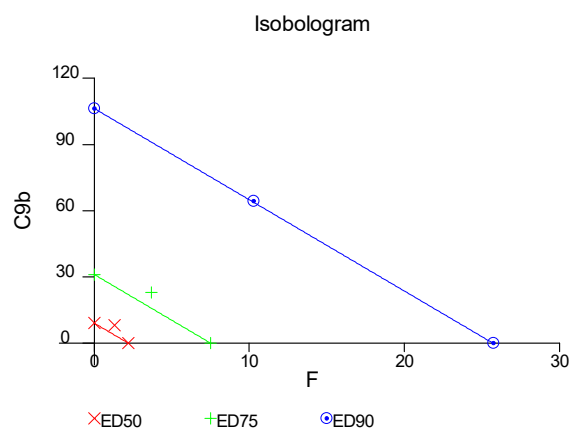

**Figure S27.** Isobologram for synergism between 9b and fingolimod on MIA PaCa-2 cell line.

# Panc-1 cell line

| Drug                               | Drug concentration |            |            |            |
|------------------------------------|--------------------|------------|------------|------------|
|                                    | I                  | II         | III        | IV         |
| HDACi ( <b>6b</b> )                | 63.68±4.70         | 25.29±6.71 | 23.93±6.23 | 10.30±1.96 |
| Fingolimod                         | 79.18±1.45         | 40.09±4.97 | 24.56±1.24 | 18.99±0.95 |
| <b>6b</b> + Fingolimod             | 84.96±2.05         | 67.22±5.98 | 37.87±5.71 | 21.98±0.78 |
| Combination Index (CI)             | 0.847              | 0.945      | 1.232      | 1.141      |
| Interaction <b>6b</b> + Fingolimod | ++                 | ±          | --         | -          |

Compound 6 (μM): I=100; II=50; III=25; IV=12.5  
Fingolimod (μM): I=12; II=6; III=3; IV=1.5

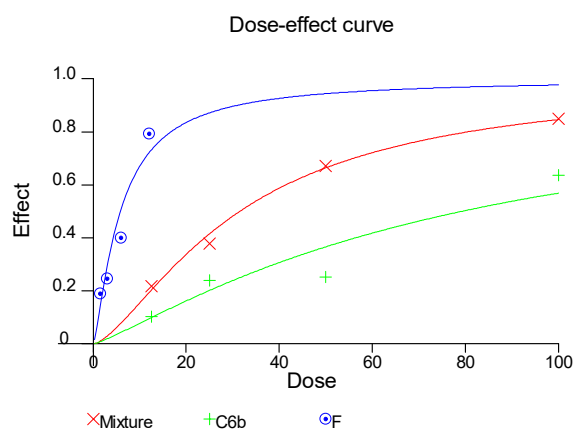

**Figure S28.** The median-effect plot for tested synergism between 6b and fingolimod on Panc-1 cell line. In this plot,  $fa$  is the fraction of cells affected, while the  $fu$  is the fraction of cells unaffected,  $D$  is the dose of a drug.



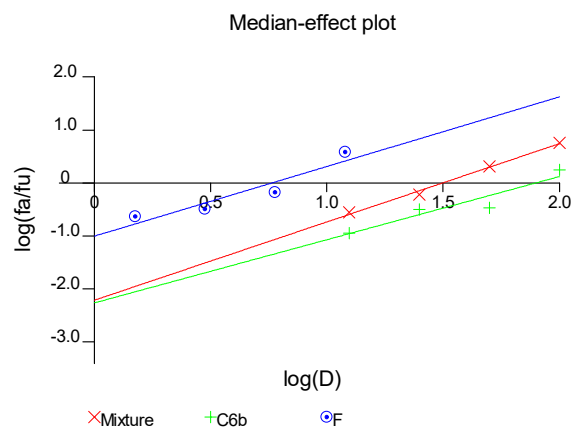

**Figure S29.** Dose-effect curve for tested synergism between 6b and fingolimod on Panc-1 cell line.

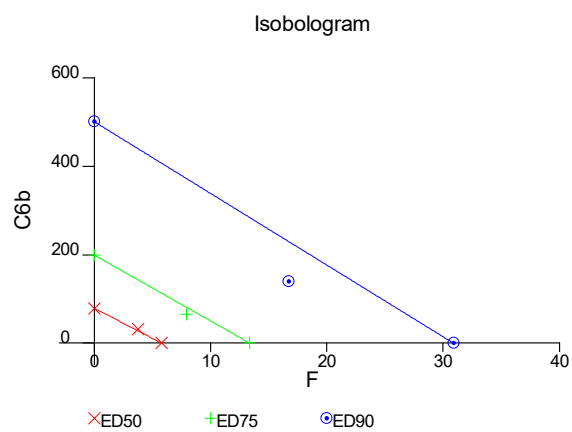

**Figure S30.** Isobologram for synergism between 6b and fingolimod on Panc-1 cell line.

# Panc-1 cell line

| Drug                               | Drug concentration |            |             |            |
|------------------------------------|--------------------|------------|-------------|------------|
|                                    | I                  | II         | III         | IV         |
| HDACi ( <b>8b</b> )                | 58.10±0.24         | 23.86±9.24 | 4.77±2.69   | 4.68±2.33  |
| Fingolimod                         | 68.24±4.62         | 41.81±5.37 | 19.44±10.97 | 12.27±8.75 |
| <b>8b</b> + Fingolimod             | 74.74±5.61         | 30.91±6.84 | 16.60±7.22  | 9.42±5.57  |
| Combination Index (CI)             | 1.267              | 1.806      | 2.027       | 1.592      |
| Interaction <b>8b</b> + Fingolimod | — —                | — — —      | — — — —     | — — —      |

Compound 8 (μM): I=20; II=10; III=5.0; IV=2.5  
Fingolimod (μM): I=12; II=6; III=3; IV=1.5

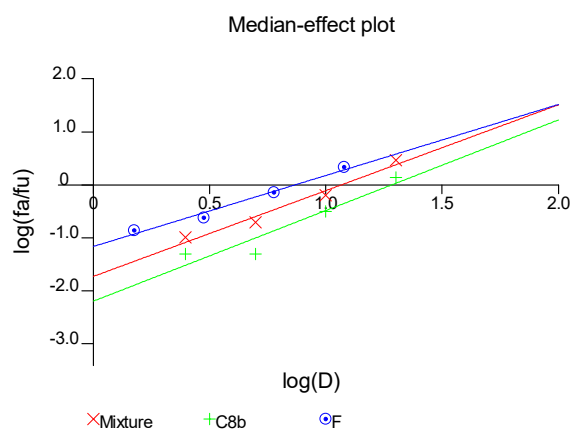

**Figure S31.** The median-effect plot for tested synergism between 8b and fingolimod on Panc-1 cell line. In this plot, *fa* is the fraction of cells affected, while the *fu* is the fraction of cells unaffected, *D* is the dose of a drug.

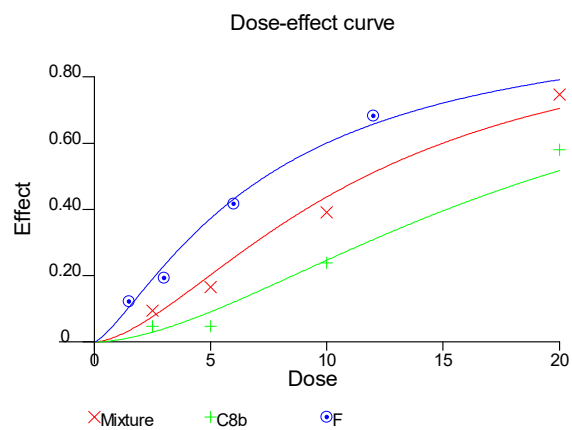

**Figure S32.** Dose-effect curve for tested synergism between 8b and fingolimod on Panc-1 cell line.

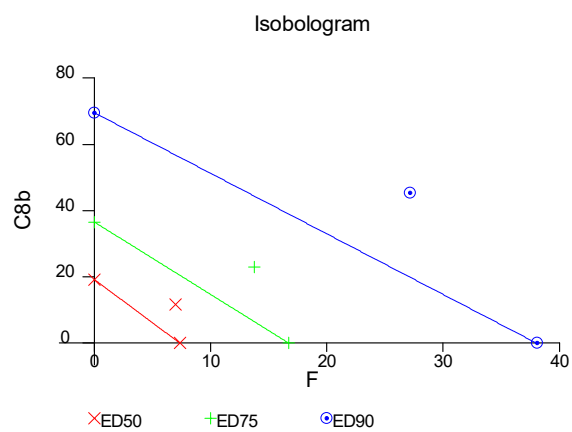

**Figure S33.** Isobologram for synergism between 8b and fingolimod on Panc-1 cell line.

# Panc-1 cell line

| Drug                                            | Drug concentration |             |             |             |
|-------------------------------------------------|--------------------|-------------|-------------|-------------|
|                                                 | I                  | II          | III         | IV          |
| HDACi ( <b>9b</b> )                             | 61.28±6.91         | 50.93±3.83  | 40.71±3.74  | 24.03±5.73  |
| Fingolimod                                      | 62.10±4.94         | 50.04±3.20  | 31.21±11.85 | 21.17±3.33  |
| <b>9b</b> + Fingolimod                          | 76.50±5.14         | 66.12±10.76 | 53.41±18.12 | 33.34±10.07 |
| Combination Index (CI)                          | 0.911              | 0.848       | 0.810       | 1.120       |
| Interaction <b>9b</b> + Fingolimod <sup>b</sup> | ±                  | ++          | ++          | —           |

Compound 9 (μM): I=50; II=25; III=12.5; IV=6.25  
Fingolimod (μM): I=12; II=6; III=3; IV=1.5

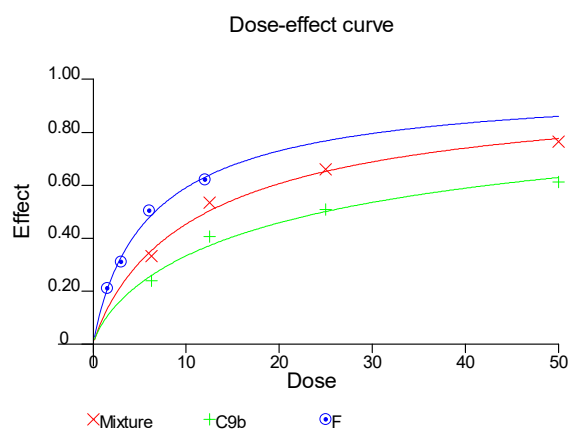

**Figure S34.** The median-effect plot for tested synergism between 9b and fingolimod on Panc-1 cell line. In this plot, *fa* is the fraction of cells affected, while the *fu* is the fraction of cells unaffected, D is the dose of a drug.

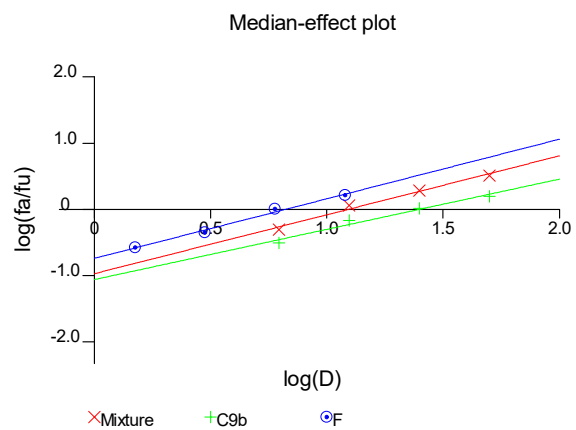

**Figure S35.** Dose-effect curve for tested synergism between 9b and fingolimod on Panc-1 cell line.

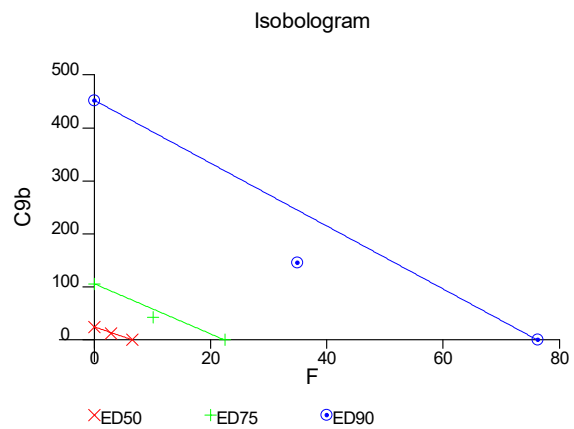

**Figure S36.** Isobologram for synergism between 9b and fingolimod on Panc-1 cell line.
